# Supplementary material for: Social determinants of health and temporospatial trends associated with Giardia duodenalis infection in Texas canines
Source: Research Square preprint supplement (doi:10.21203/rs.3.rs-8780015/v1), 2026-02-24

**Supplement**

Figure S.1. Trends in canine *Giardia* test positivity, 2012-2022.

Multi-panel figure showing county-specific trends in test positivity over the study period. Each panel represents a single Texas county.

Counties included (panel letter in parentheses) are: Bell (A), Bexar (B), Brazoria (C), Cameron (D), Collin (E), Comal (F), Dallas (G), Denton (H), Ellis (I), El Paso (J), Fort Bend (K), Galveston (L), Grayson (M), Gregg (N), Guadalupe (O), Harrison (P), Hays (Q), Hidalgo (R), Hood (S), Hunt (T), Johnson (U), Kaufman (V), Kendall (W), Lubbock (X), Midland (Y), Montgomery (Z), Navarro (AA), Nueces (BB), Parker (CC), Tarrant (DD), Travis (EE), Victoria (FF), Walker (GG), Williamson (HH), Wood (II), and state of Texas (JJ).

The y-axis represents county-level test positivity (proportion of tests with positive results), and axes/scales are consistent across panels to support visual comparison of temporal patterns between counties.

A.


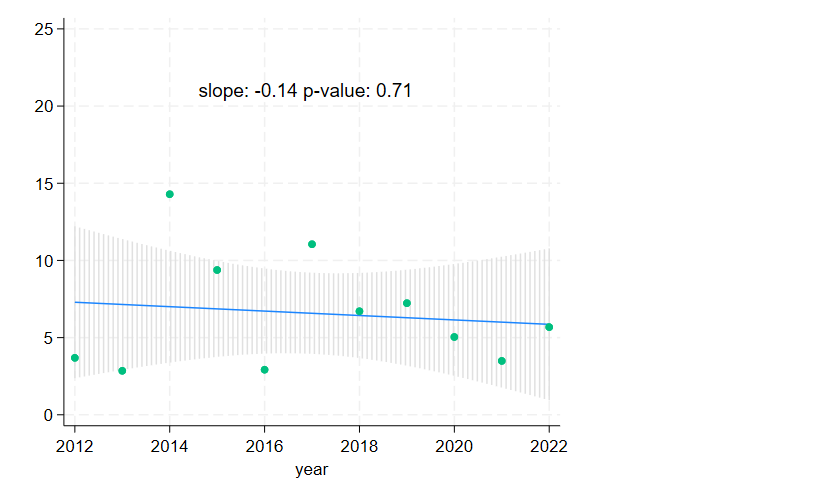


B.


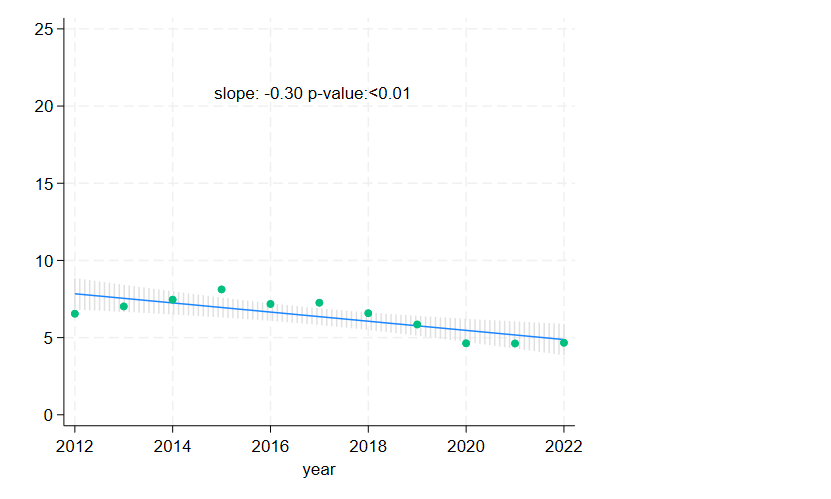


C.


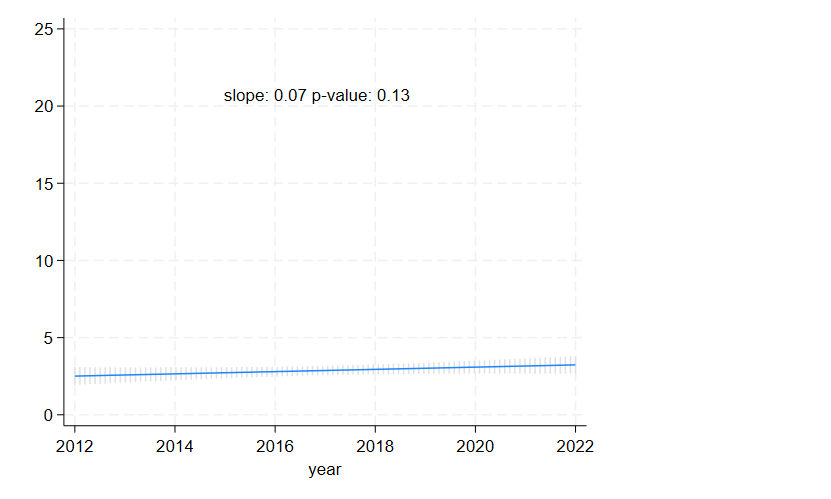


D.


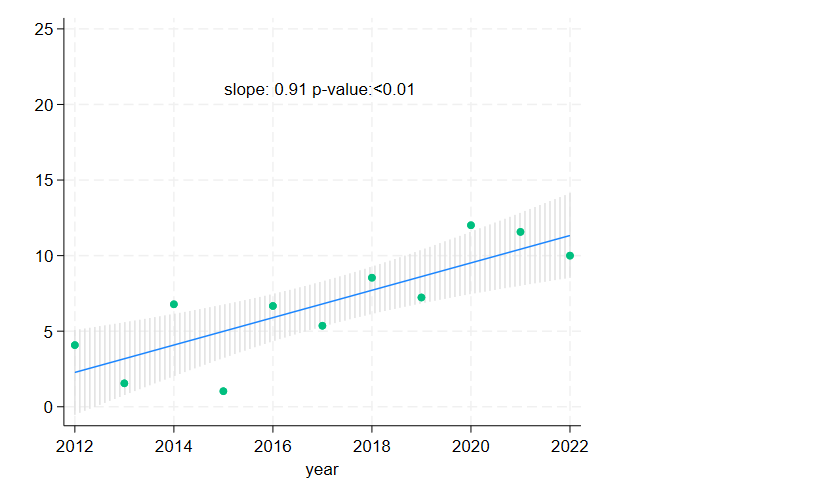


E.


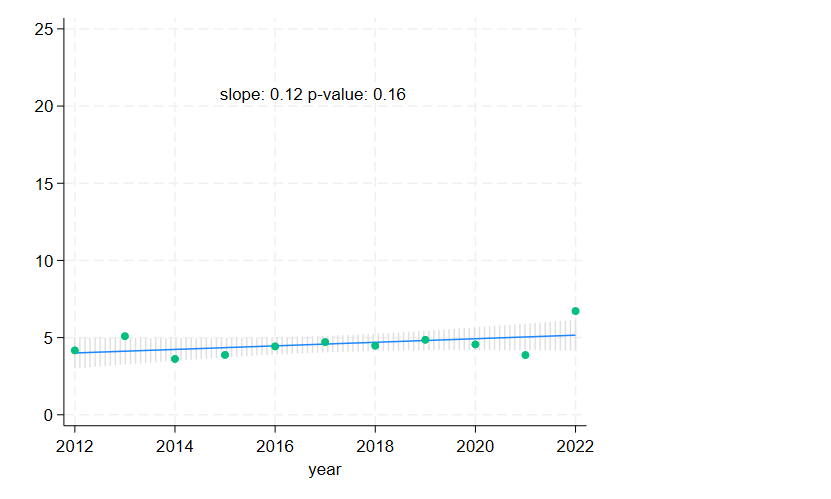


F.


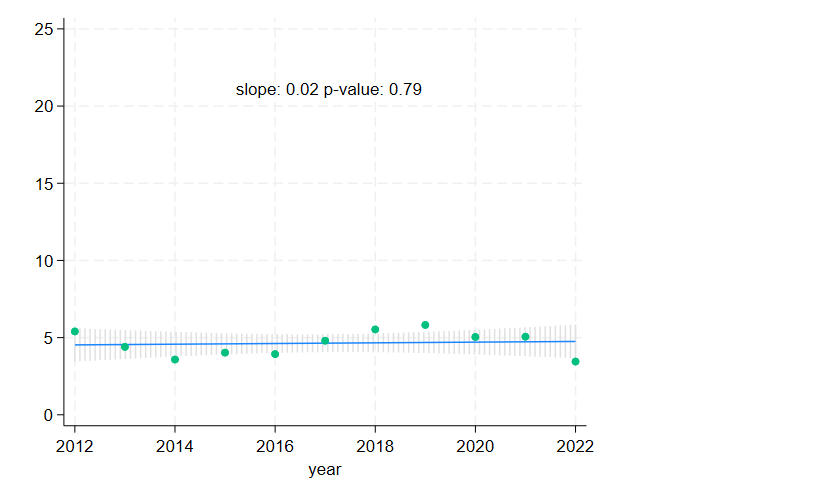


G.


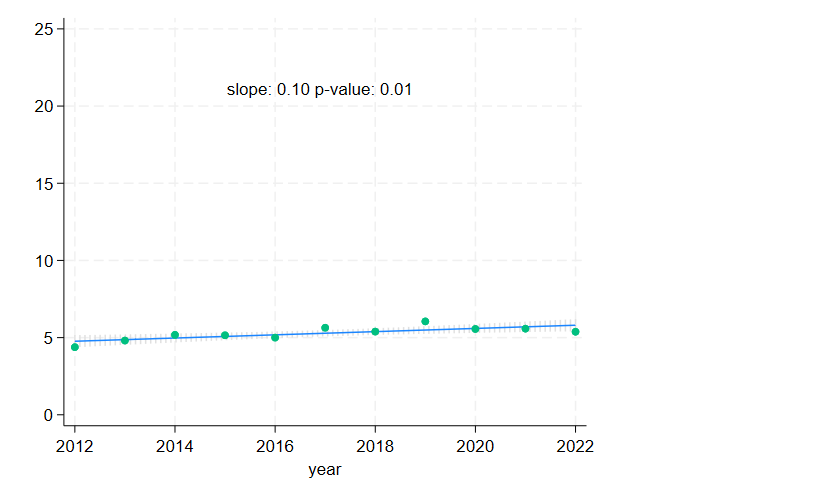


H.


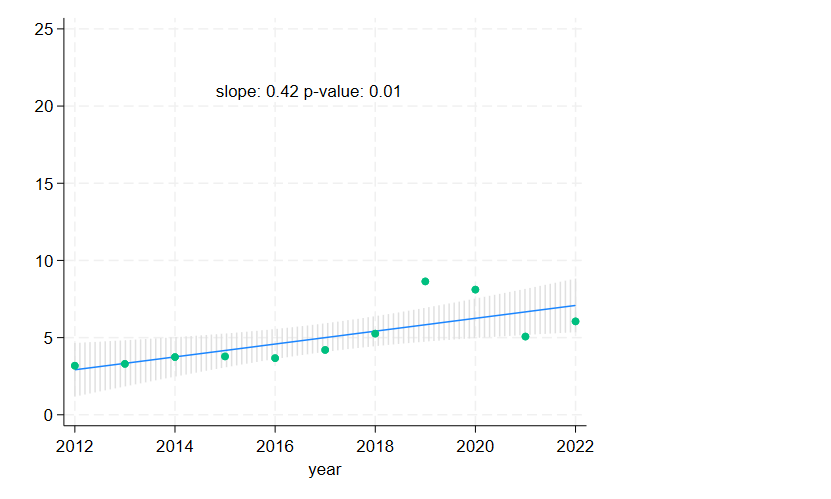


I.


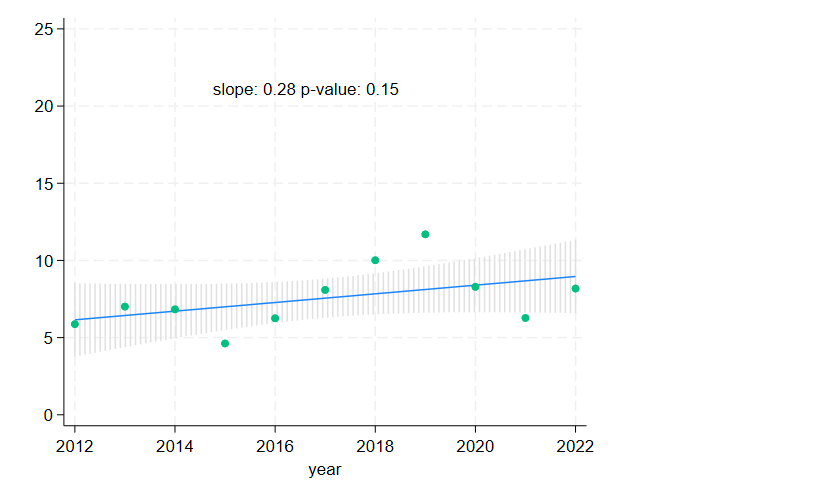


J.


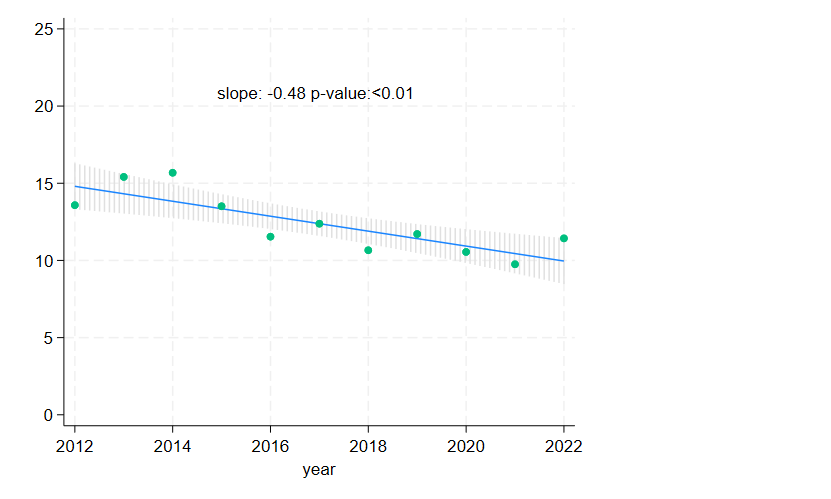


K.


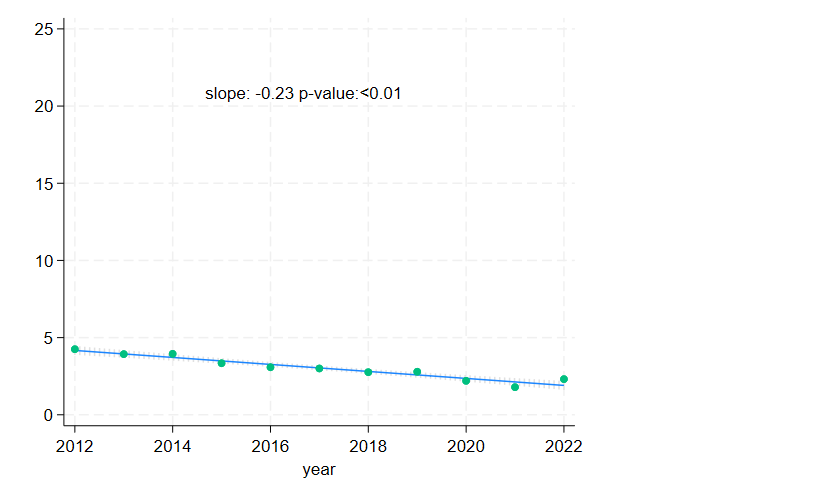


L.


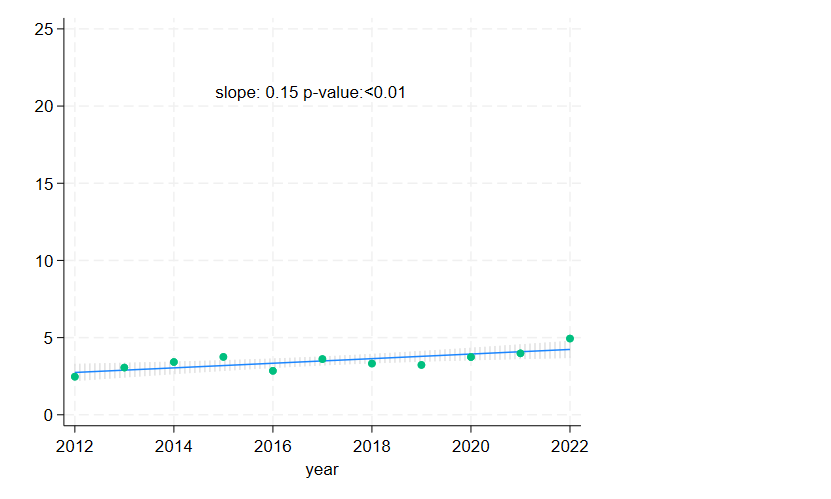


M.


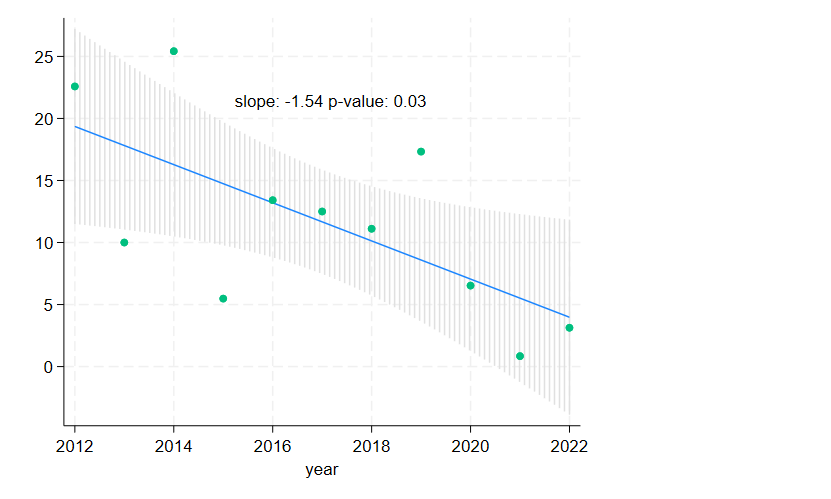


N.


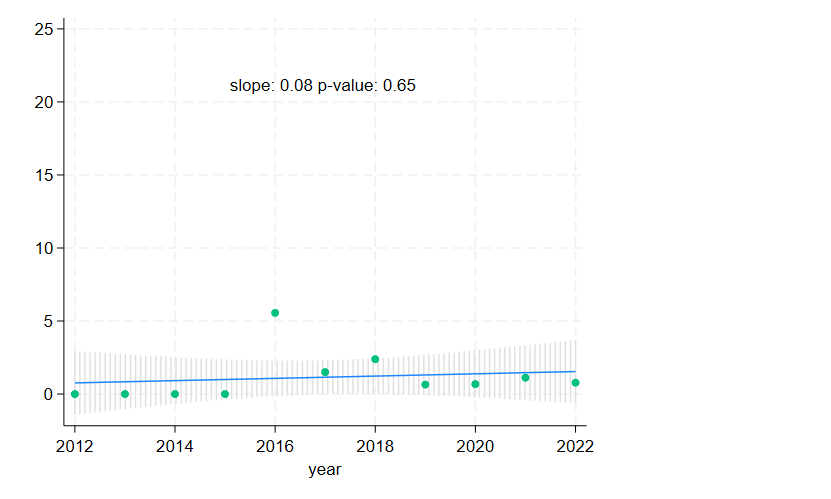


O.


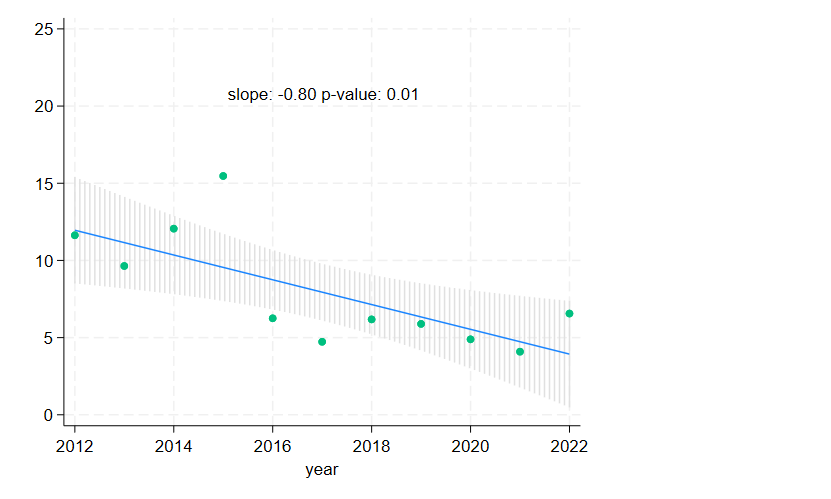


P.


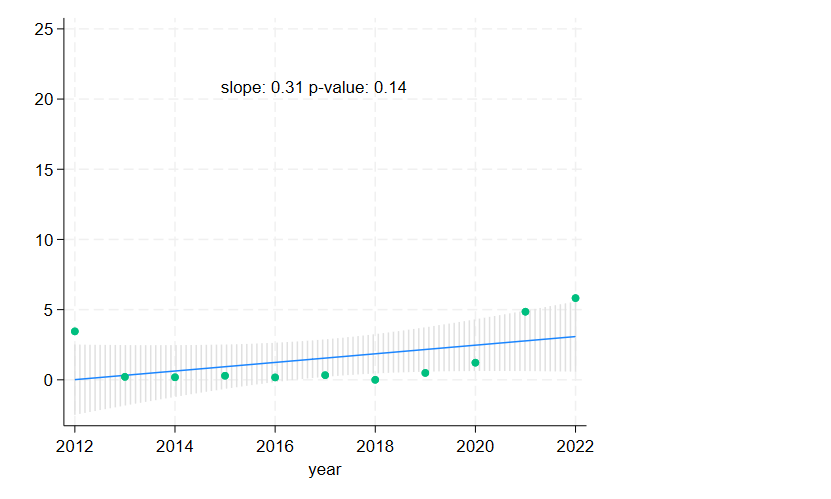


Q.


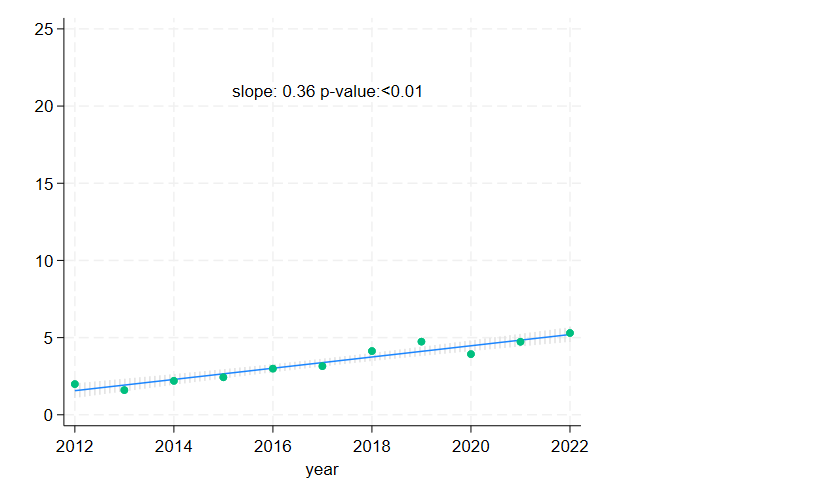


R.


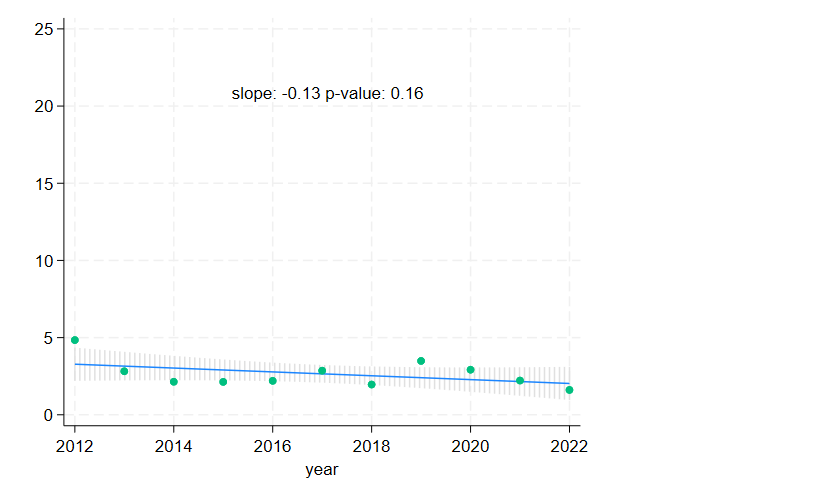


S.


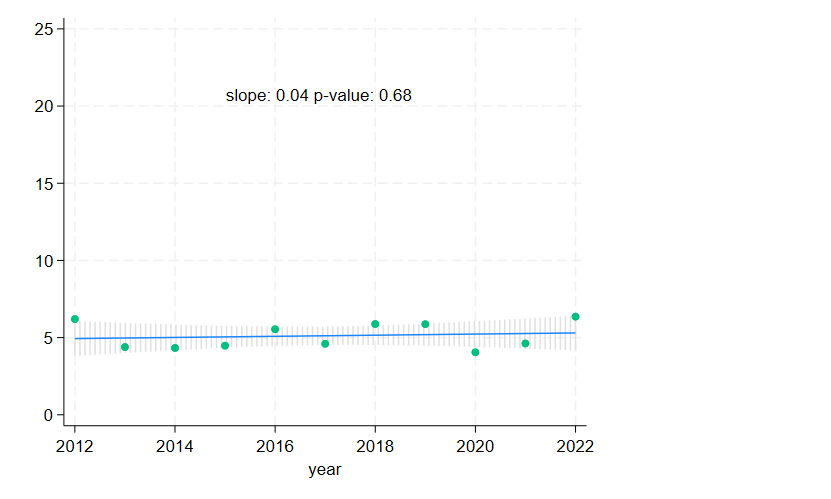


T.


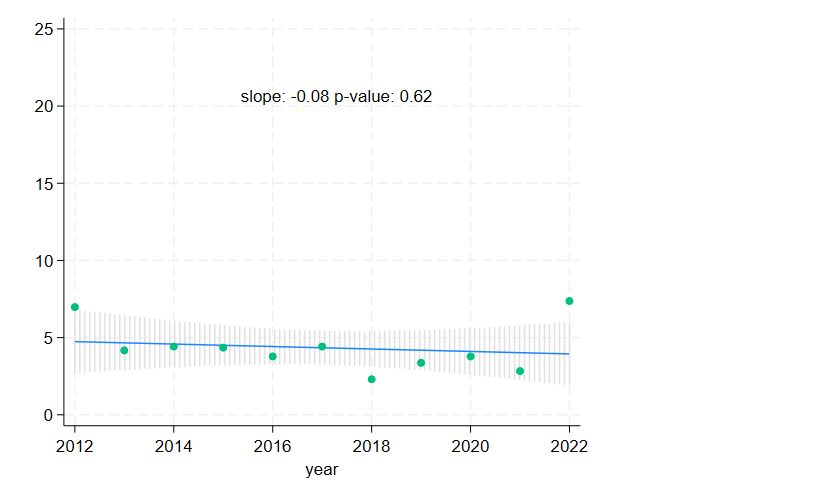


U.


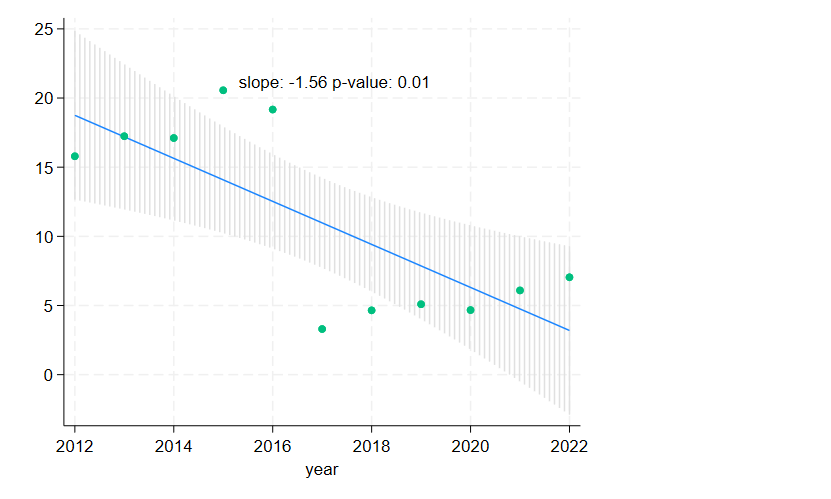


V.


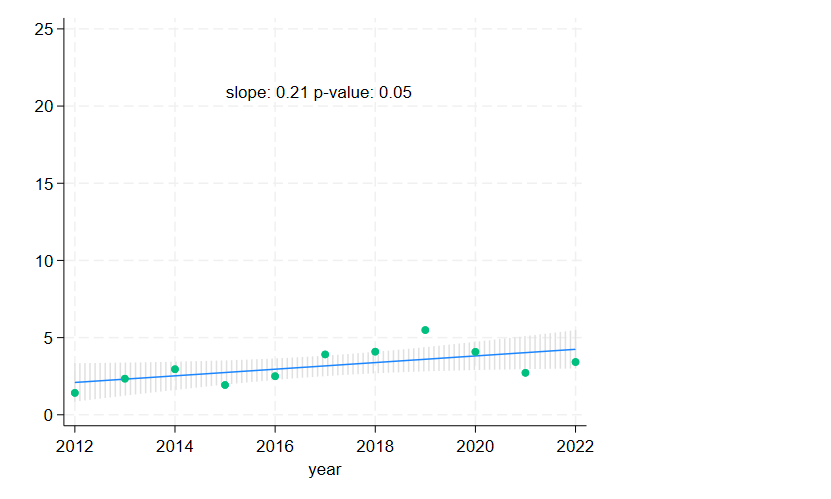


W.


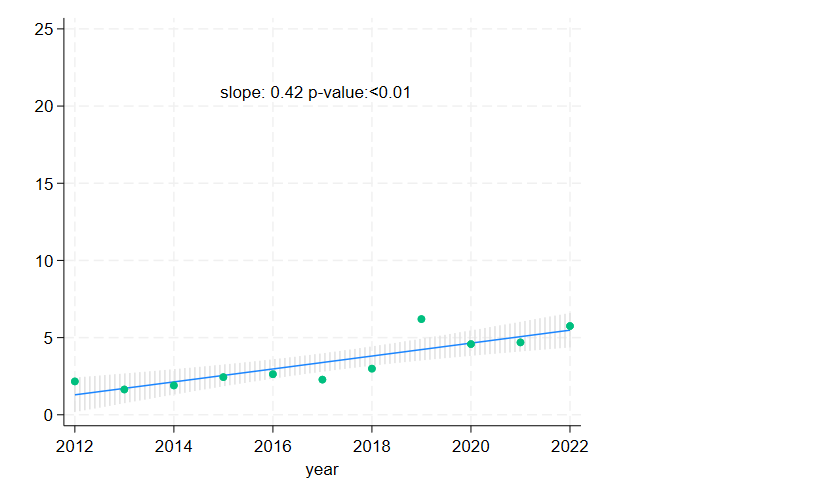


X.


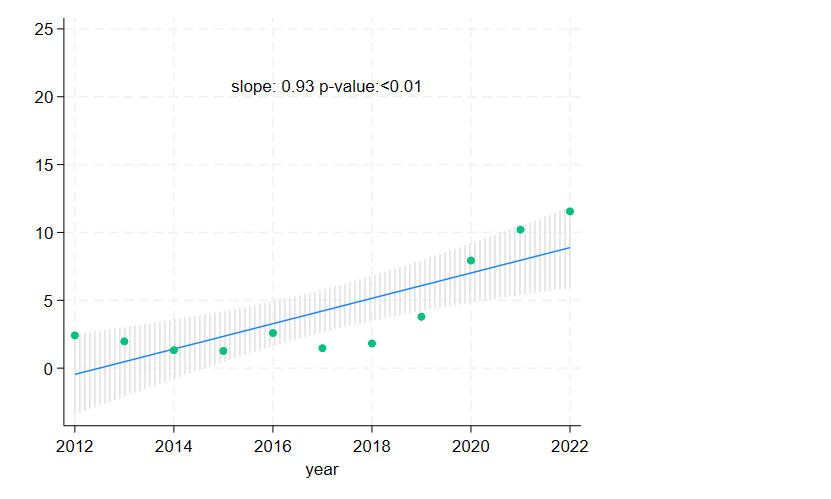


Y.


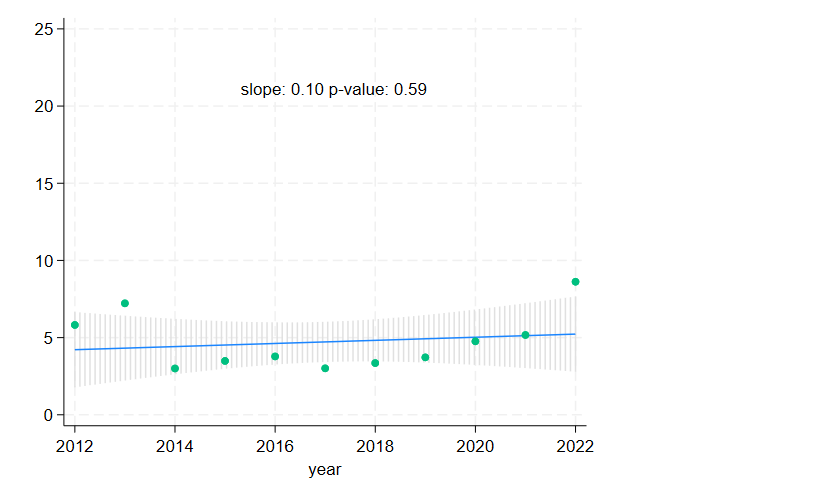


Z.


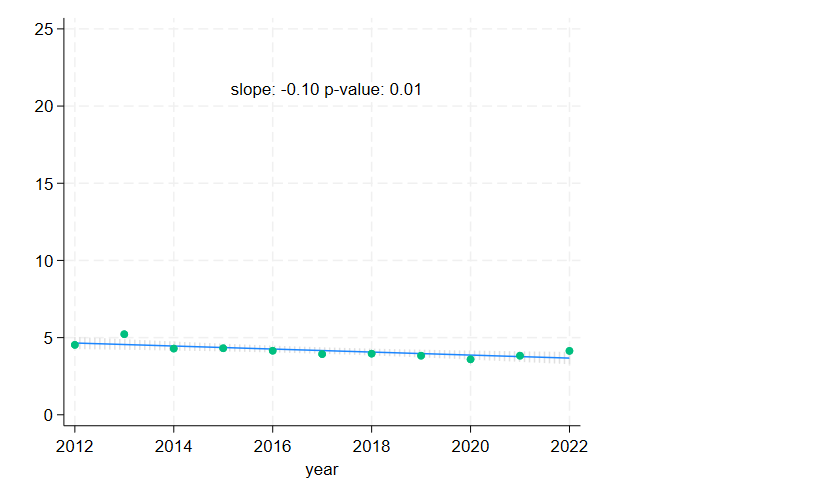


AA.


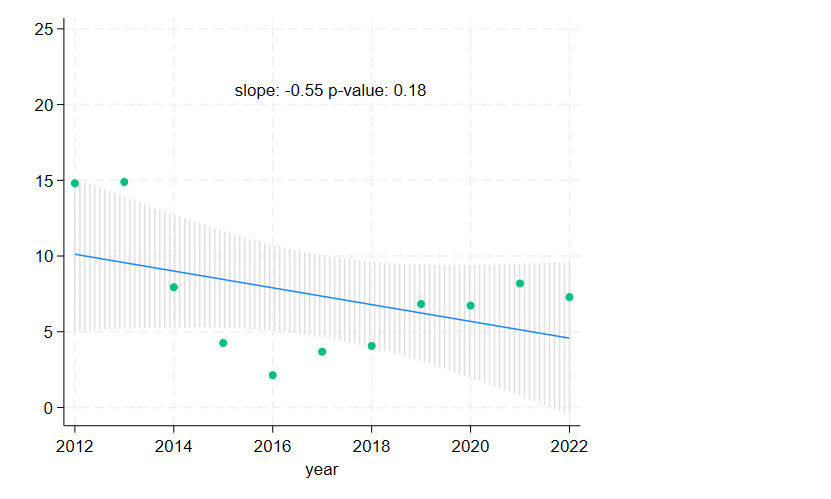


BB.


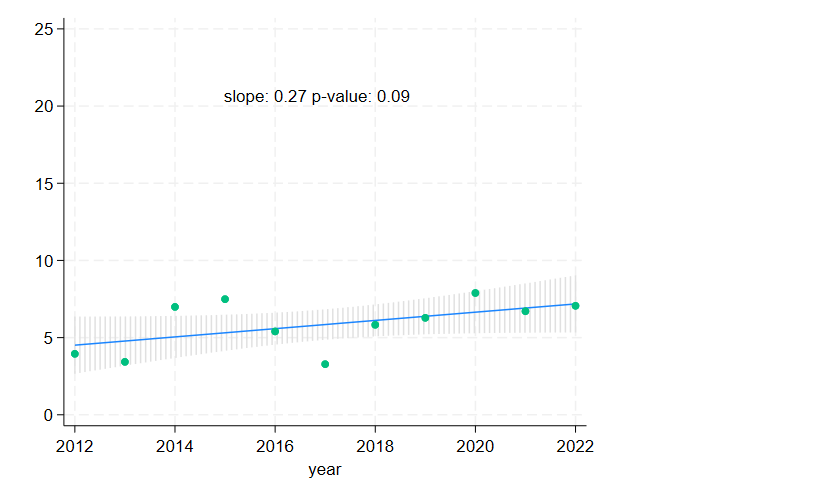


CC.


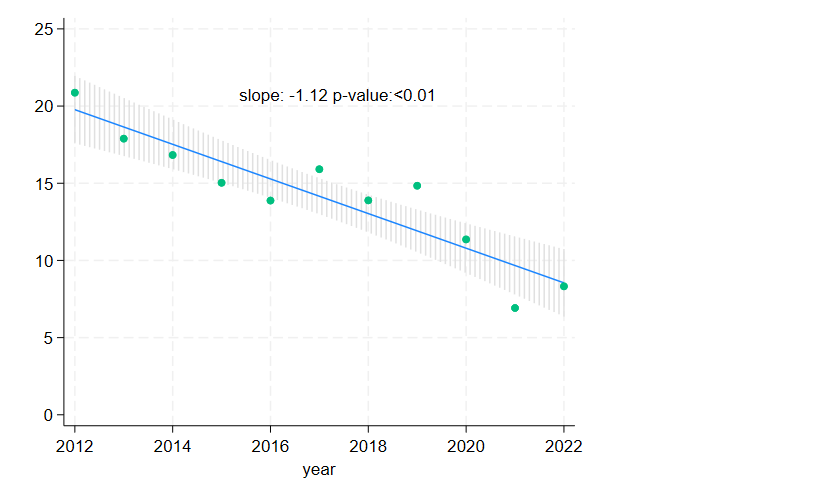


DD.


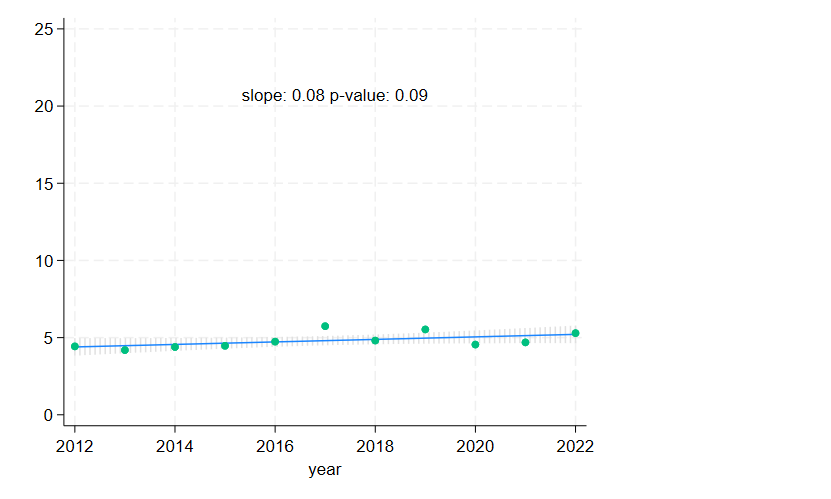


EE.


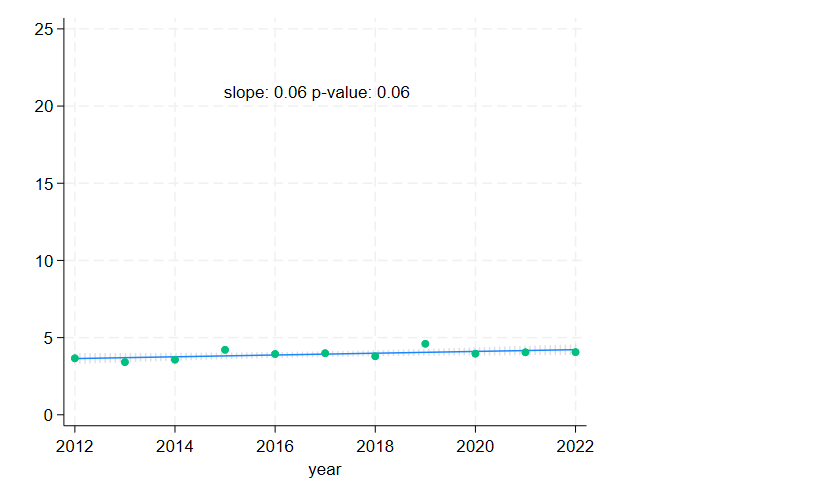


FF.


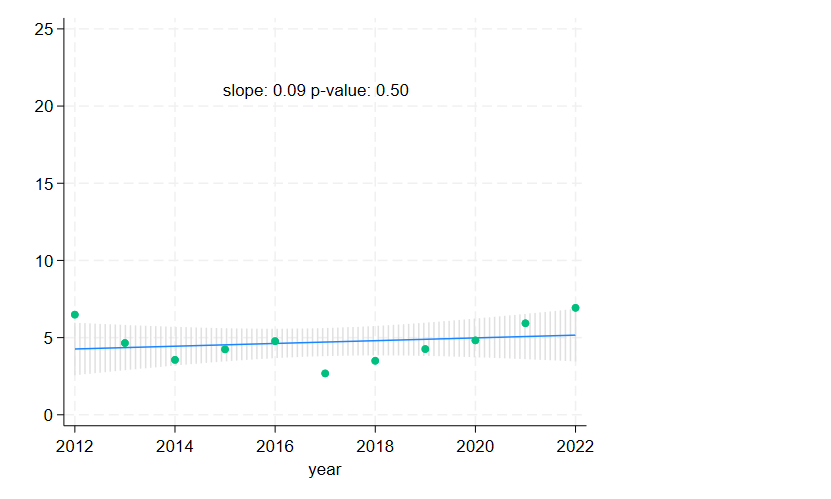


GG.


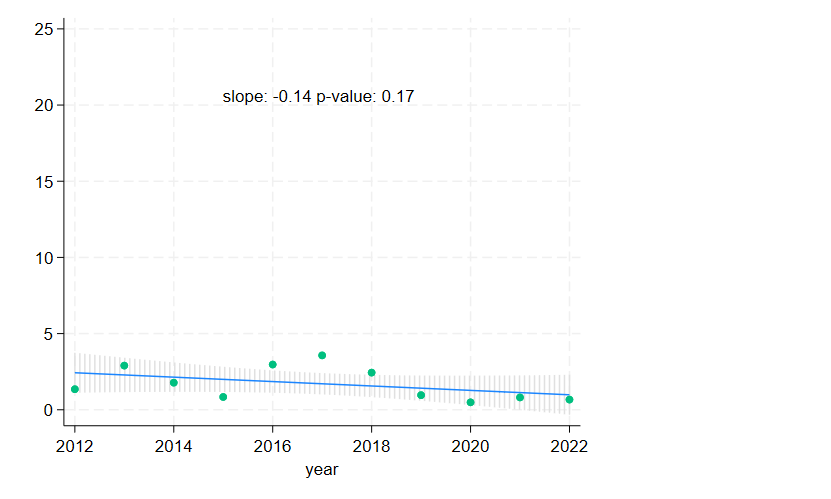


HH.


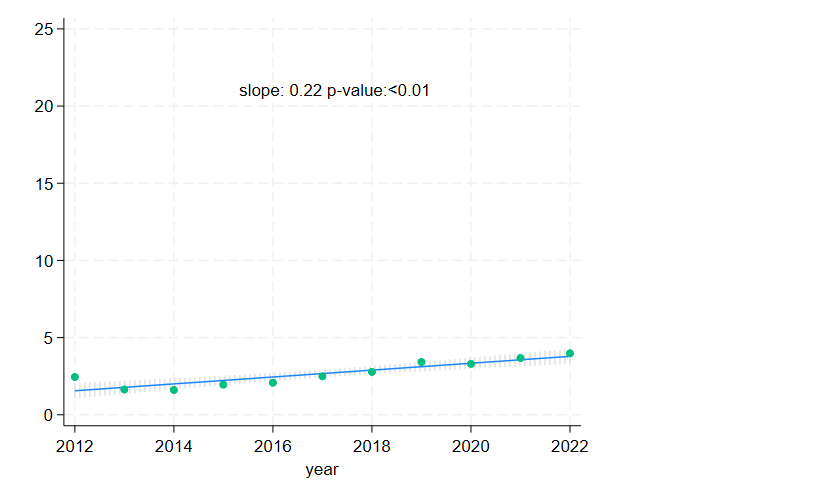


II.


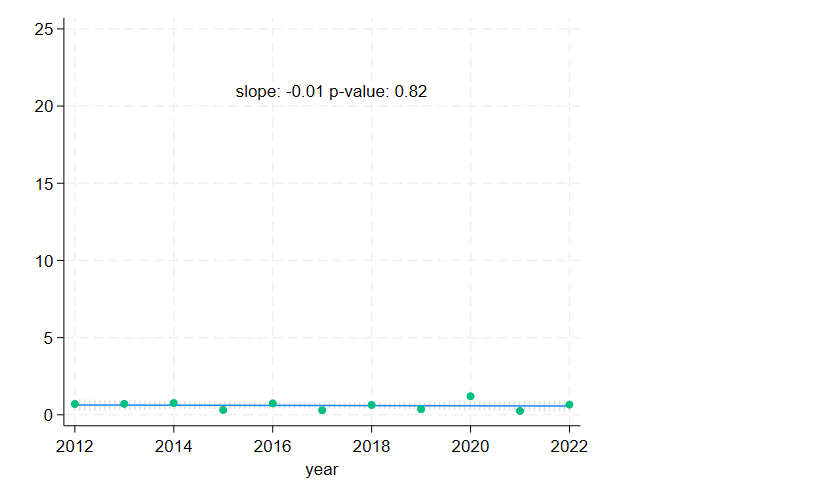


JJ.


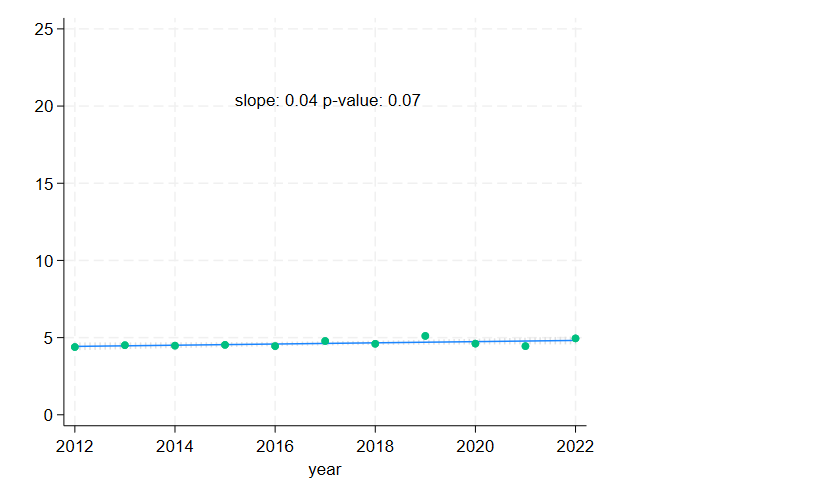

Supplement: Supplementary file 1 [file 348a093e491b85b6220d44b5.docx]
